# Supplementary material
Source: Springer Nature journal article supplement (https://www.springermedizin.de/resource/supplementary/12891_2014_2321_MOESM3_ESM.pdf/9509934)
Supplement: MOESM3 [file 9509934]

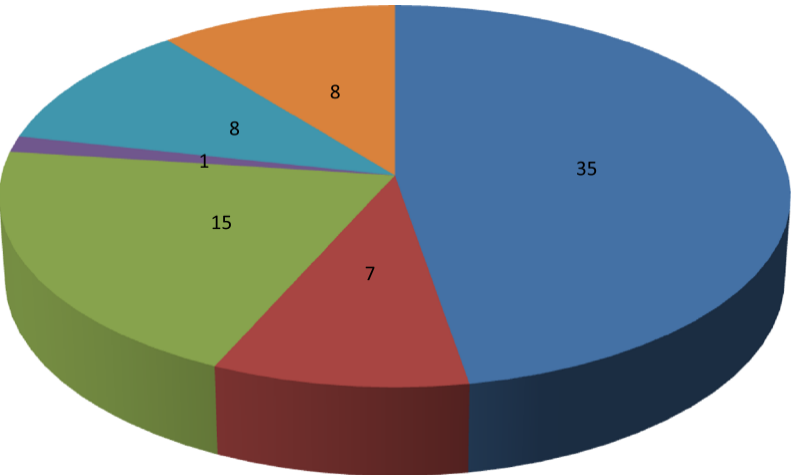

- Definitive fractures, missing NOMESCO coding
- Trochanter major avulsion
- Other hip fractures conservatively treated due to anatomically correct situation and/or short total life expectancy / major comorbidity
- Fracture treated with Girdlestone procedure (NGF09)
- Death before surgical intervention
- Death during hospitalization, after surgical intervention
